# Supplementary material for: Airway stem cell reconstitution by the transplantation of primary or pluripotent stem cell-derived basal cells
Source: PubMed Central journal article supplement — Cell Stem Cell. Author manuscript; Available in PMC 2023 Sep 27. (PMC10528754; doi:10.1016/j.stem.2023.07.014), 2023-08-24
Supplement: NIHMS1928352-supplement-MMC1.pdf [file NIHMS1928352-supplement-MMC1.pdf]

**Supplemental Information**

**Airway stem cell reconstitution  
by the transplantation of primary or pluripotent  
stem cell-derived basal cells**

**Liang Ma, Bibek R. Thapa, Jake A. Le Suer, Andrew Tilston-Lünel, Michael J. Herriges, Andrew Berical, Mary Lou Beermann, Feiya Wang, Pushpinder S. Bawa, Anat Kohn, Alexandra B. Ysasi, Hirofumi Kiyokawa, Taylor M. Matte, Scott H. Randell, Xaralabos Varelas, Finn J. Hawkins, and Darrell N. Kotton**

A

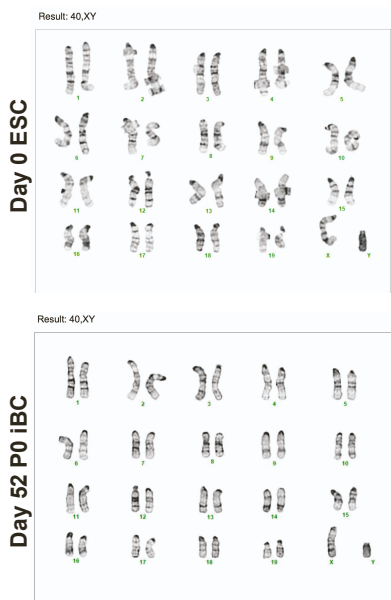

B

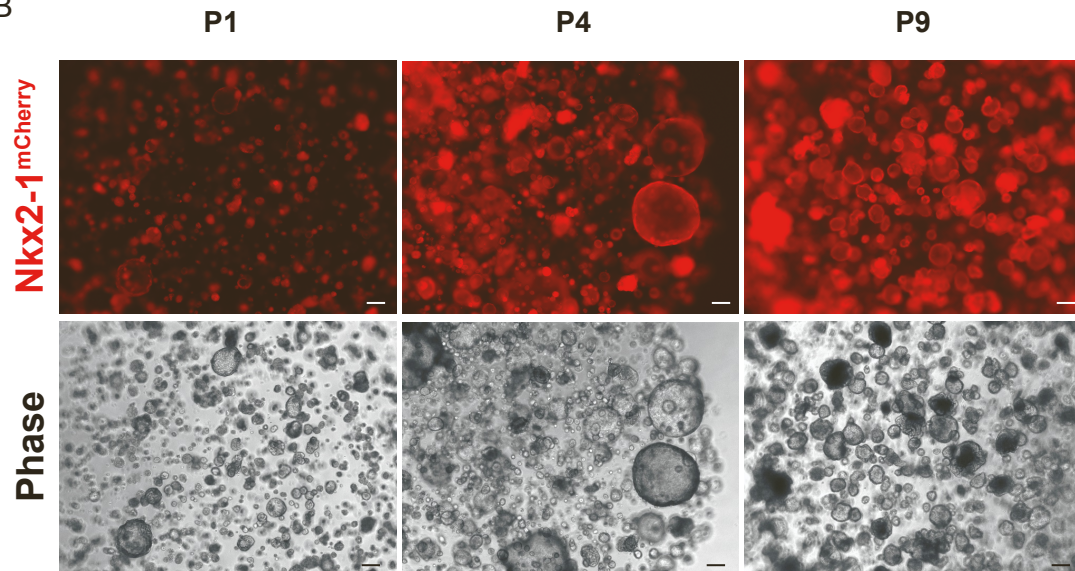

C

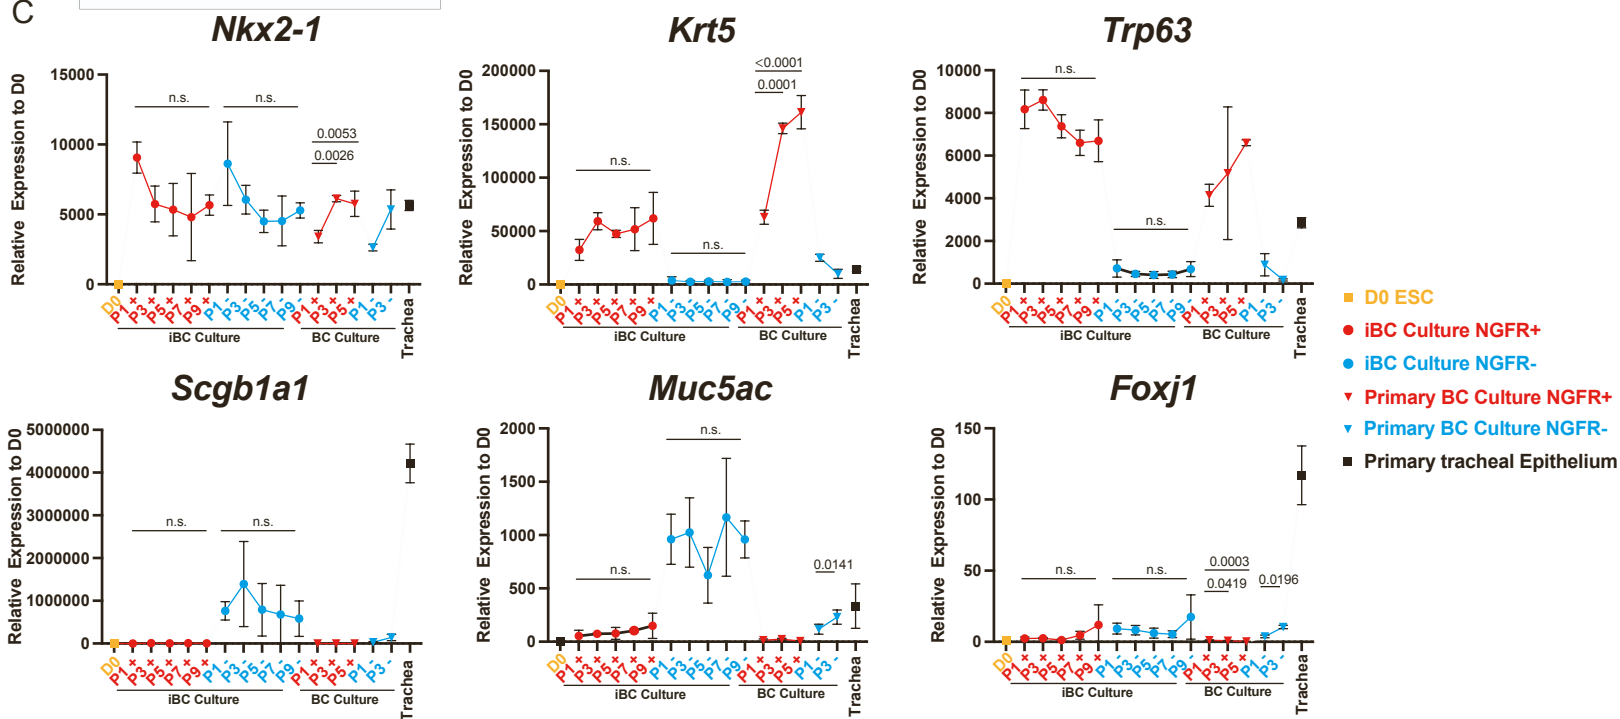

D

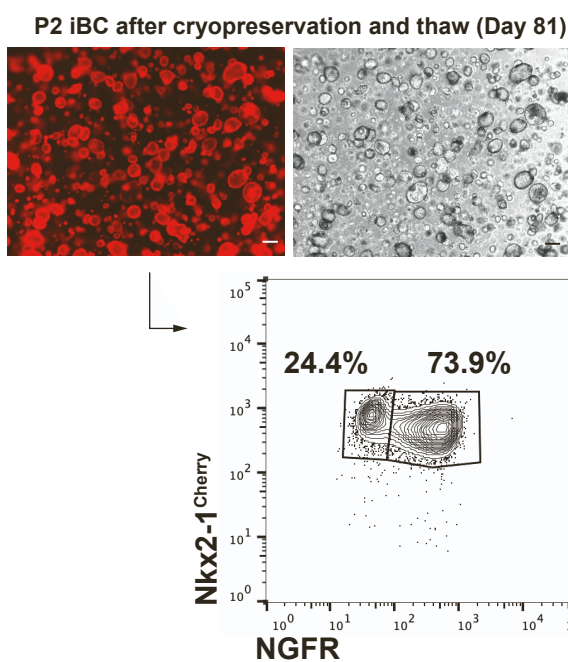

E

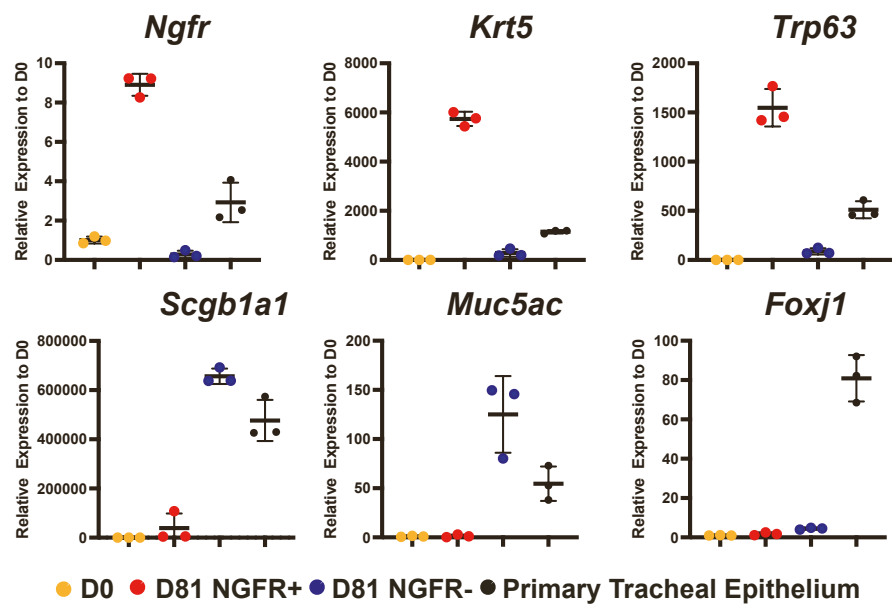

**Supplementary Figure 1: Characterization of murine iBC and primary BC cultures, Related to Main Figure 1**

- (A) Representative G-banding analysis indicating karyotypically normal undifferentiated murine ESCs and differentiated iBCs.
- (B) Representative images of iBC cultures at P1, P4, and P9. Scale bars, 200  $\mu\text{m}$ .
- (C) RT-qPCR analysis of iBC and primary BC cultures. Bars indicate mean  $\pm$  SD.  $n = 3$  biological replicates. For comparisons with three or more samples, one-way ANOVA was used. For comparisons with only two samples, paired two-tail Student's t-test was used.
- (D) Representative image and corresponding FACS analysis of iBC culture two passages (P2; D81) after thawing from cryopreservation. Scale bars, 200  $\mu\text{m}$
- (E) RT-qPCR analysis of iBC P2 after thawing from cryopreservation. Bars indicate mean  $\pm$  SD.  $n = 3$  biological replicates.

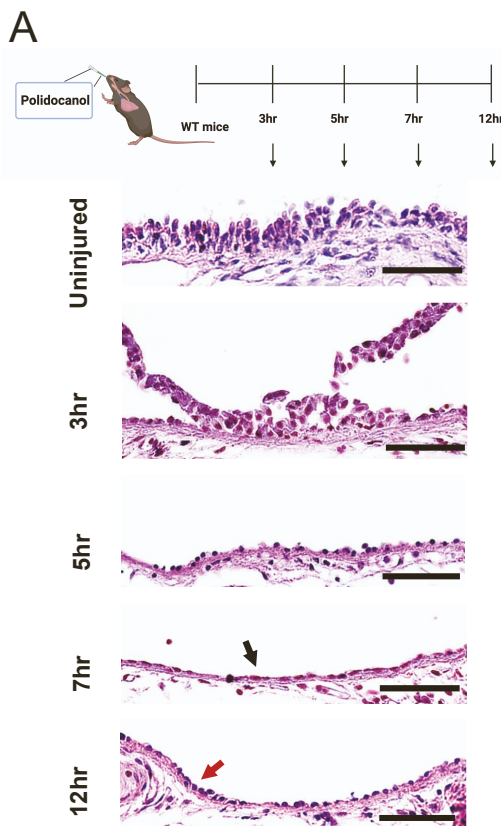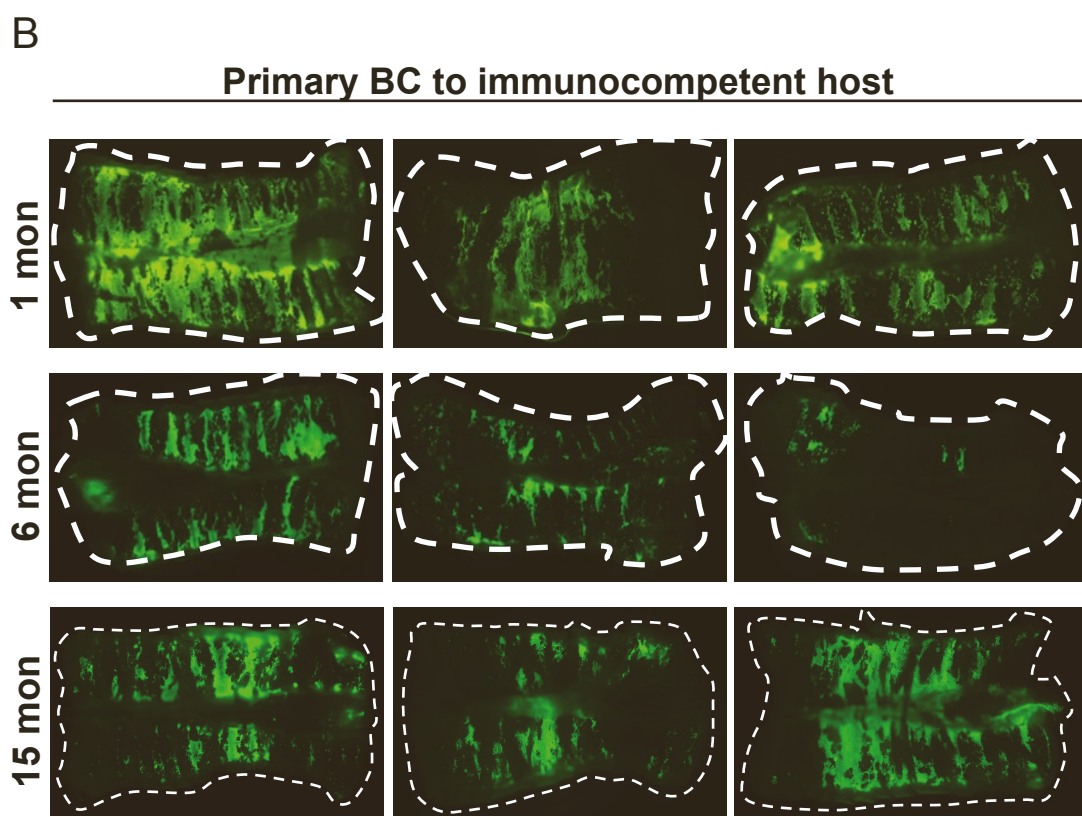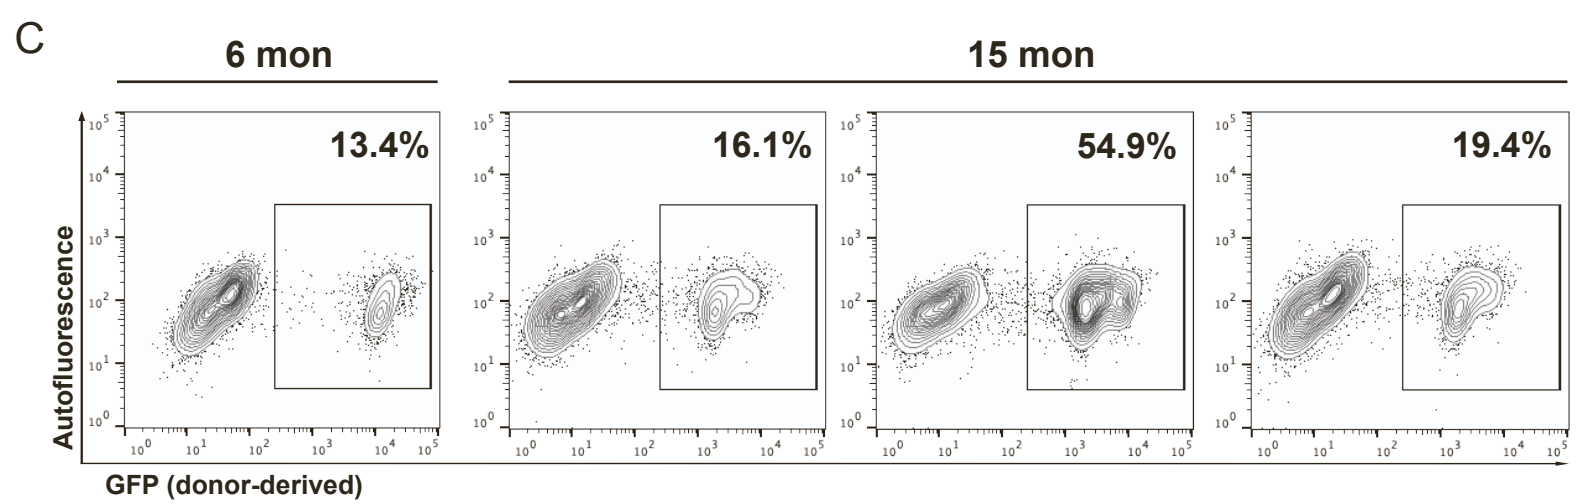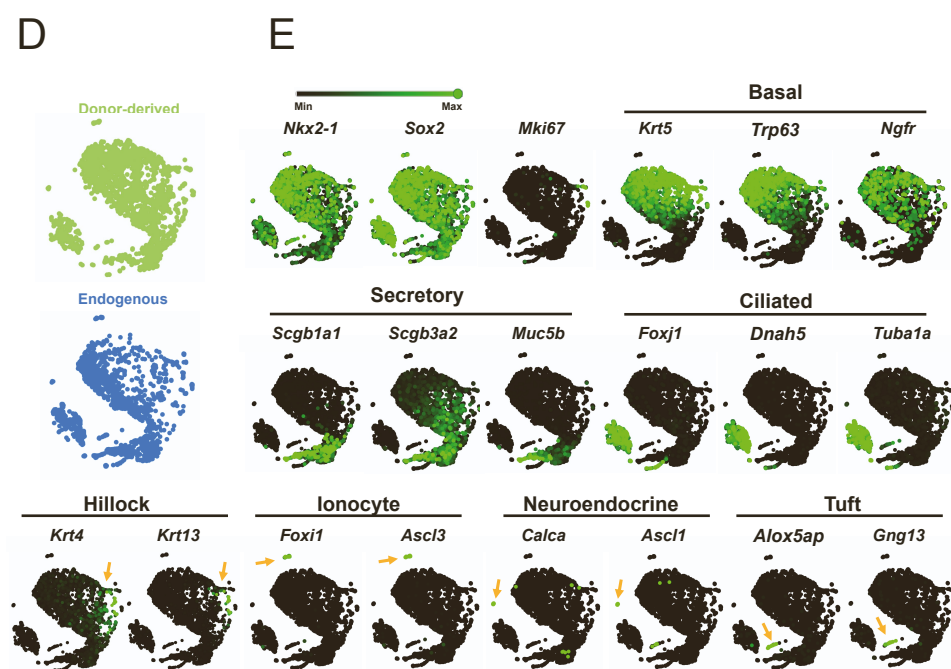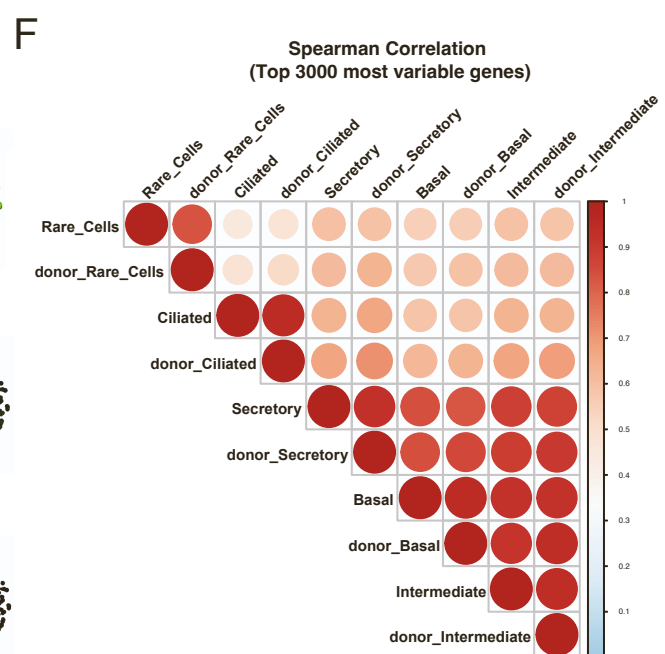

**Supplementary Figure 2: Post-injury mouse tracheal histological time series assessment and syngeneic transplantation of murine primary BC into immunocompetent recipient mice, Related to Main Figure 2**

- (A) Representative H&E staining of mouse tracheas 3, 5, 7, and 12 hours post-polidocanol injury. At 7hrs post-injury, black arrow indicates flattened cells covering the basement membrane. At 12hrs post-injury, red arrow indicates clusters of epithelial cells. Scale bars, 50  $\mu$ m.
- (B) Tracheal whole mount fluorescence microscopy and FACS of recipients of GFP+ primary BCs, shown at various timepoints (1, 6 or 15 months, n = 9) post-transplantation.
- (C) FACS analysis of primary BC recipient at 6- or 15-months post-transplantation, demonstrating persistence of donor-derived cells in recipient tracheas.
- (D) SPRING visualization of scRNA-Seq of primary BC recipient, separated by sample origin (also shown in main Figure 2E).
- (E) Selected canonical marker gene expression levels (in green) overlaid on combined SPRING plots from (C).
- (F) Spearman correlation coefficients of single cell transcriptomic profiles of donor-derived and endogenous cells in recipients of primary mouse BCs (69 days post transplantation) based on the Top 3000 most variable genes.

**A**

Day 106 iBC post-lentiviral transduction and freeze-thaw

Result: 40,XY

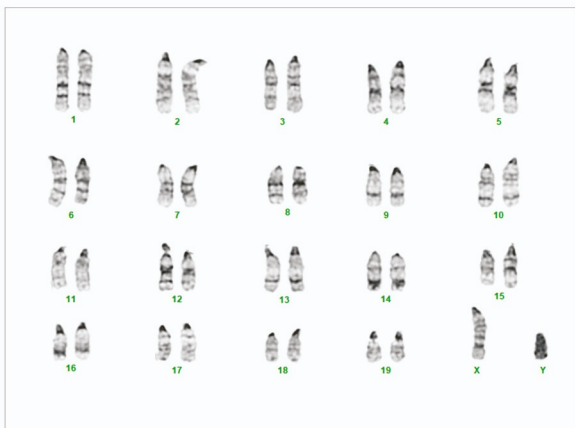**B**

GFP E-Cadherin KRT5 Nuclei

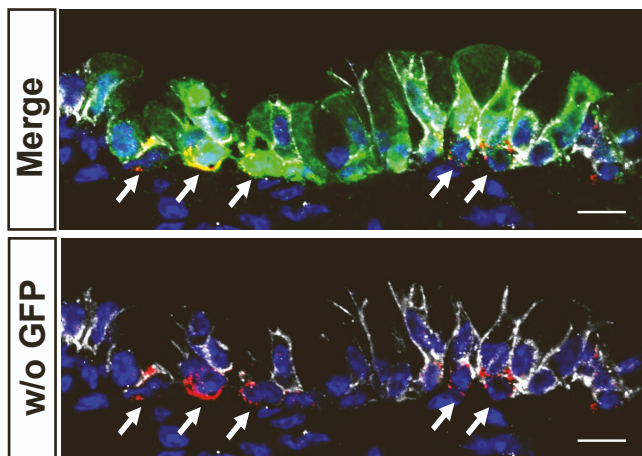**C**

GFP ACTUB Nuclei

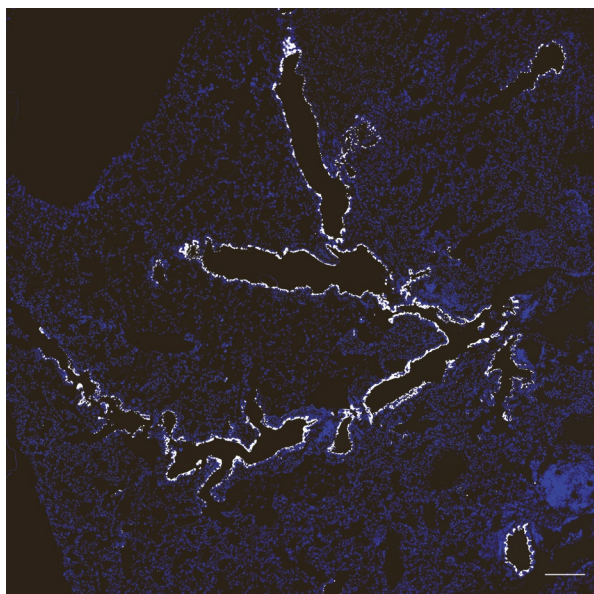

Majority cases (14/19)  
Specific sample from 192 dpt (Fig.3C)

GFP ACTUB Nuclei

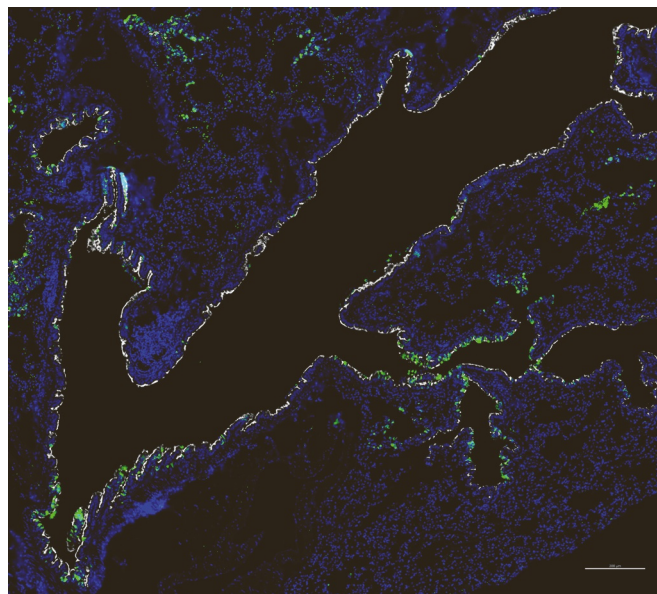

Minority cases (5/19)  
Specific sample from 310 dpt

**D**

GFP KRT5 Nuclei

GFP SCGB1A1 Nuclei

GFP ACTUB Nuclei

GFP NKX2-1 Nuclei

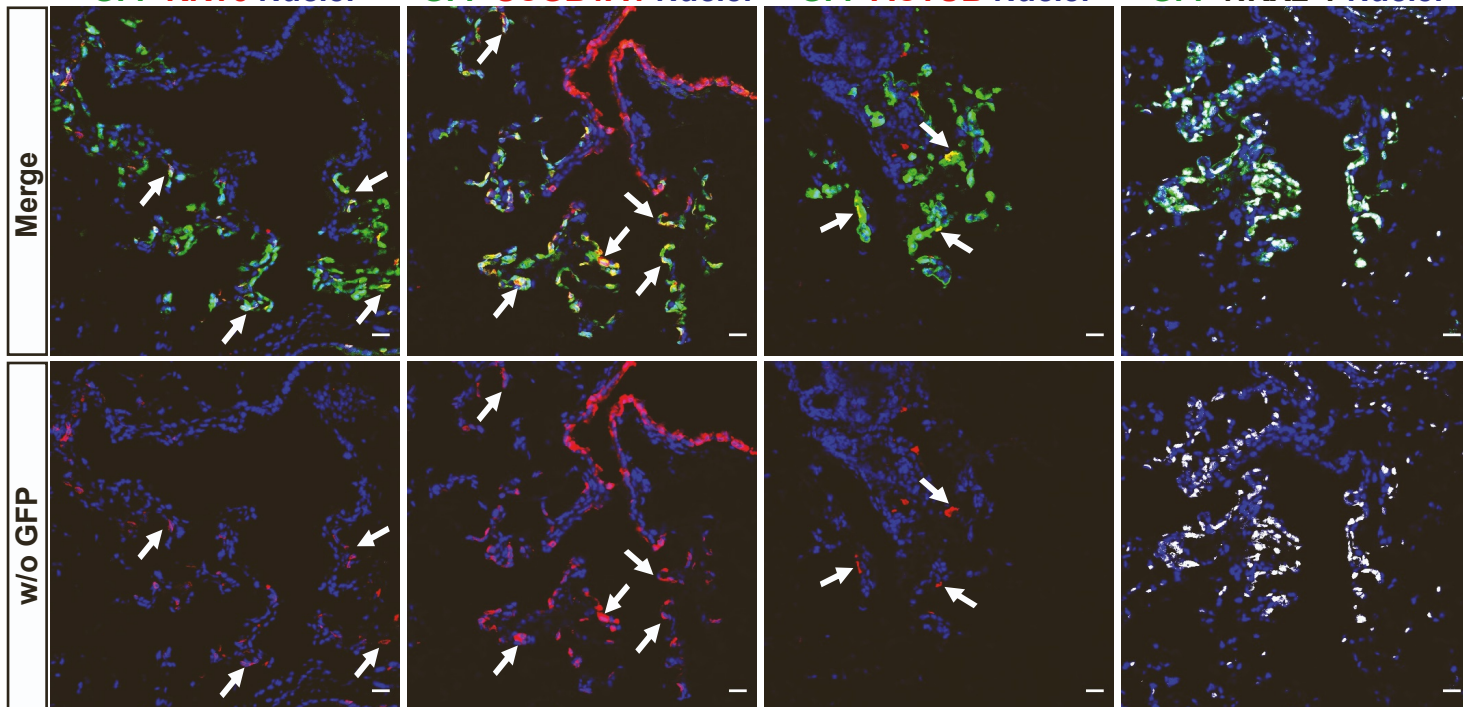

**Supplementary Figure 3: Syngeneic transplantation of murine iBC into immunocompetent recipient mice, Related to Main Figure 3**

- (A) Representative G-banding analysis indicating karyotypically normal donor iBCs after lentiviral transduction, cryopreservation, and thawing prior to transplantation.
- (B) Immunofluorescence confocal microscopy for GFP, KRT5, and E-Cadherin in iBC recipient trachea 1-year post-transplantation. Nuclei are counterstained with Hoechst33342. White arrows indicate GFP+ cells co-expressing KRT5. Lower panels have the GFP channel removed. Scale bars, 10  $\mu$ m.
- (C) Left: representative distal lung immunofluorescence microscopy of iBC recipient. Right: in rare cases, GFP+ signal was observed in the intrapulmonary large and small (distal) airways. Nuclei are counterstained with Hoechst33342. Scale bars, 200  $\mu$ m.
- (D) Immunofluorescence confocal microscopy for GFP, ACTUB, SCGB1A1, KRT5, and NKX2-1 in iBC recipient intrapulmonary airway. Nuclei are counterstained with Hoechst33342. White arrows indicate GFP+ cells co-expressing canonical airway epithelial markers. Lower panels have the GFP channel removed. Scale bars, 20  $\mu$ m.

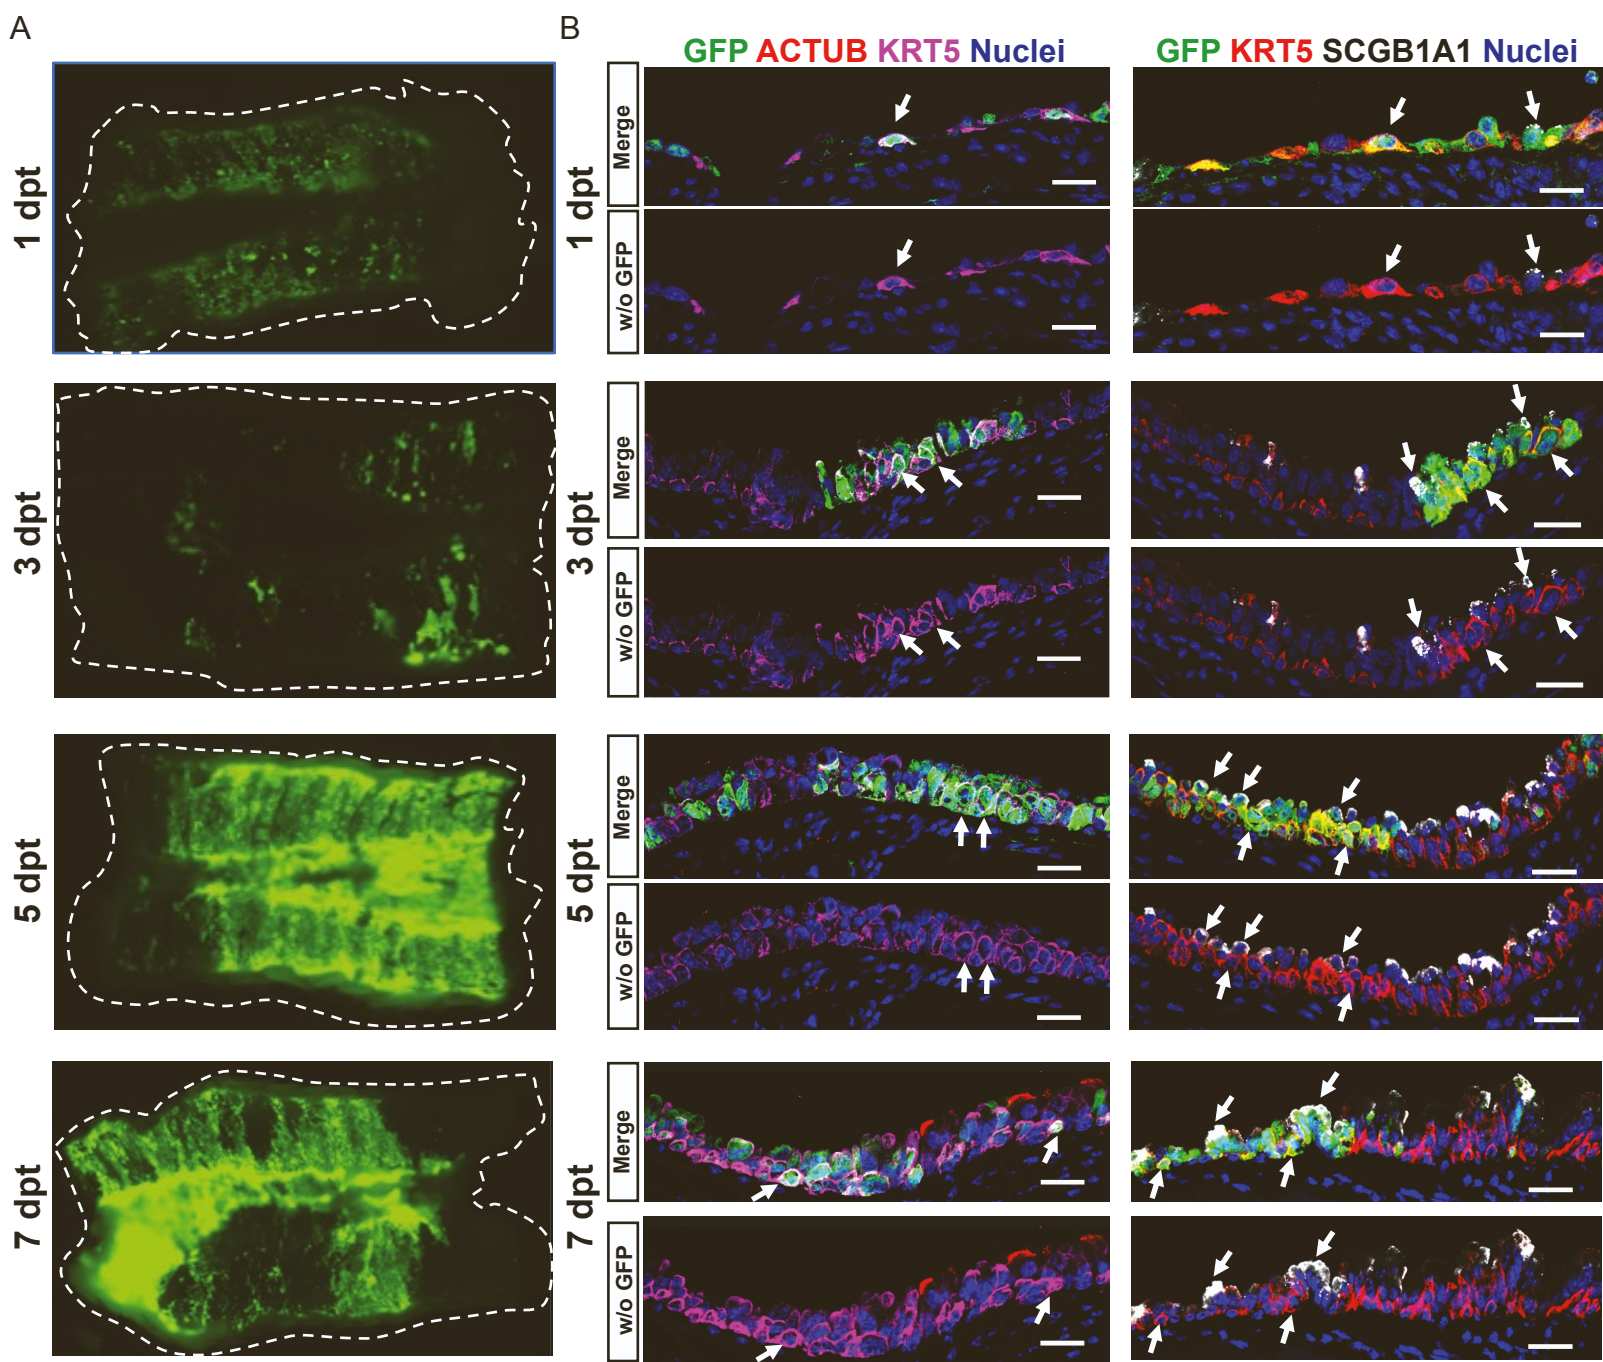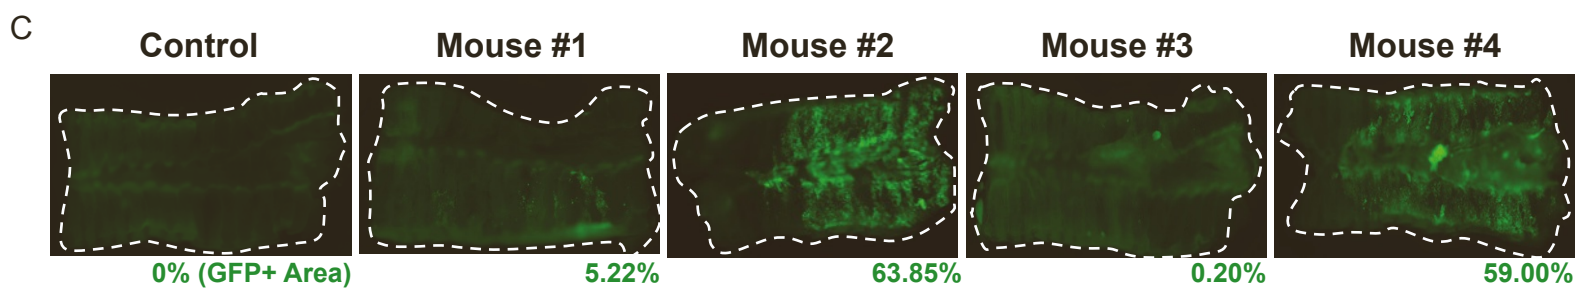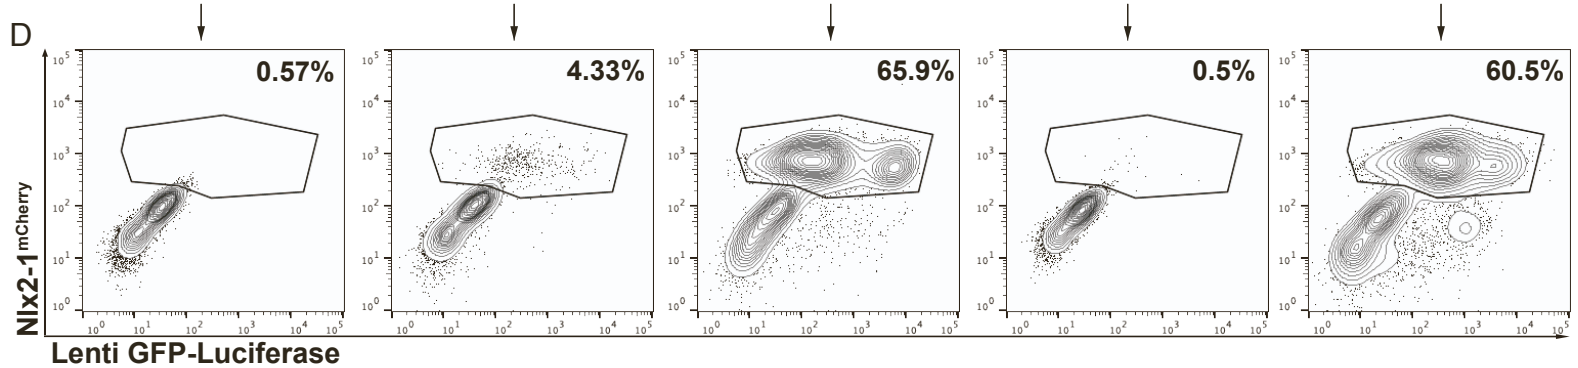



**Supplementary Figure 4: Dynamic changes post-murine iBC transplantation, Related to Main Figure 3**

- (A) Whole mount fluorescence of iBC recipients 1, 3, 5, or 7 days post-transplantation.
- (B) Immunofluorescence confocal microscopy for GFP, ACTUB, SCGB1A1, KRT5, NKX2-1 in iBC recipient tracheas at 1, 3, 5, or 7 days post-transplantation. Nuclei are counterstained with Hoechst33342. White arrows indicate GFP+ cells co-expressing canonical airway epithelial markers. Lower panels have the GFP channel removed. Scale bars, 10  $\mu$ m.
- (C) Whole mount tracheal fluorescence and corresponding FACS analysis (gated from all live cells harvested from the digest) of recipients of iBCs labeled with GFP-Luciferase expressing lentivirus as shown in Figure 3H. Transplantation efficiencies measured by GFP+% area over total trachea area (marked by dotted line) are shown below each recipient trachea image.
- (D) Corresponding FACS plots for tracheas shown in (C).

A

**Louvain Clustering**

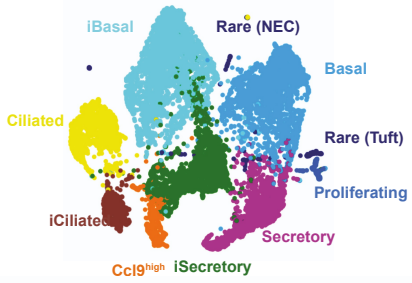

B

**Neuroendocrine**

**Tuft**

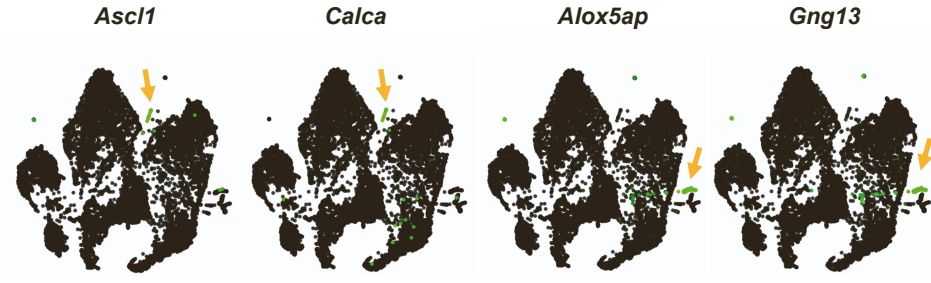

C

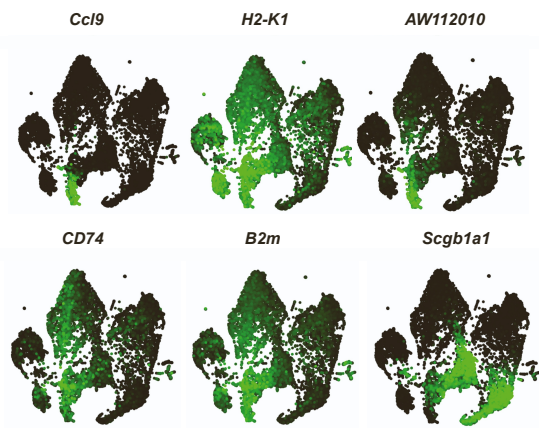

D

**Hallmark Pathway Analysis**

DEG in Ccl9<sup>high</sup> (1406 genes - LogFC>0.25, FDR<0.05)

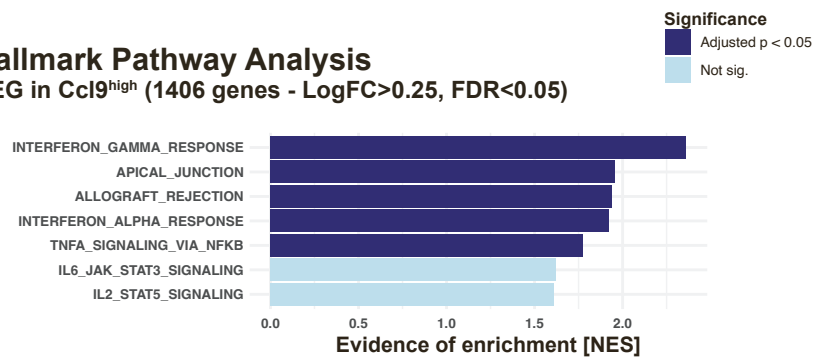

E

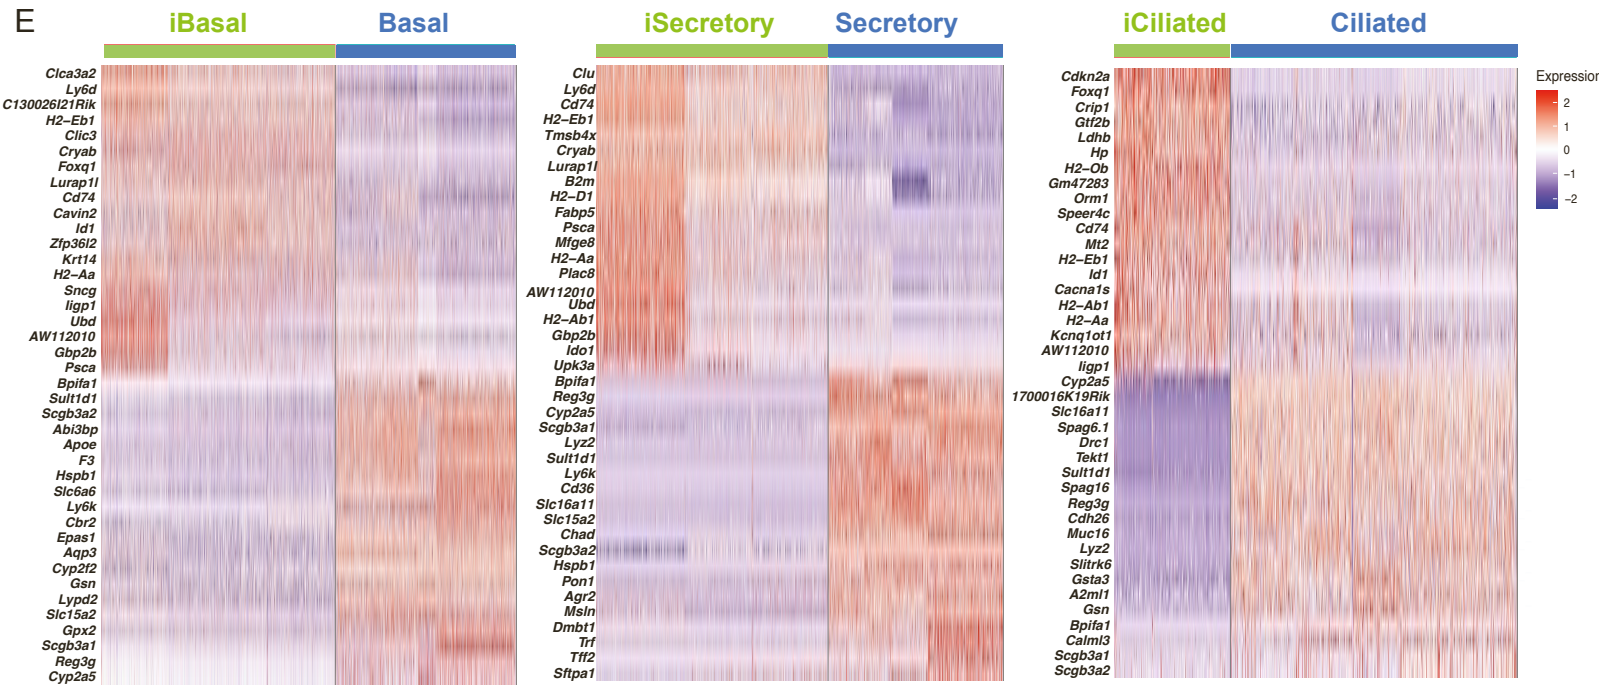

F

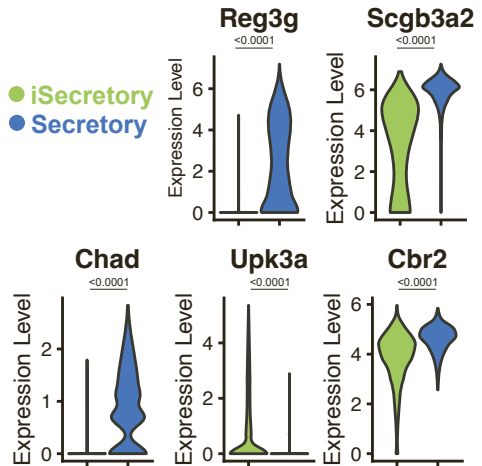

G

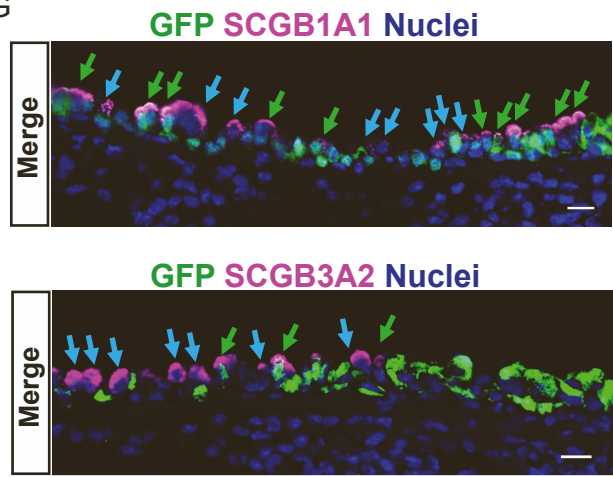

H

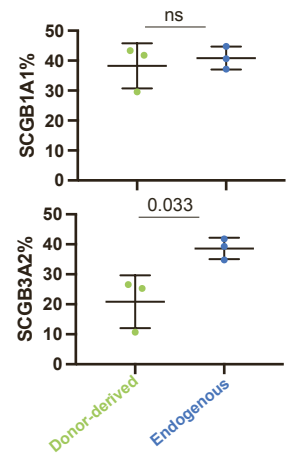

### Supplementary Figure 5: Single cell transcriptomic profiling of murine iBC recipient tracheas, Related to Main Figure 4

- (A) SPRING Visualization of iBC recipient tracheas profiled by scRNA-Seq. Cells are colored by Louvain clustering (resolution = 0.2) and annotated as in Figure 4C.
- (B) Expression of rare cell canonical gene markers (green) overlaid on SPRING plots from (A).
- (C) Expression of selected genes associated with H2-K1+ Scgb1a1<sup>low</sup> airway progenitor cells<sup>24</sup> by scRNA-Seq.
- (D) Gene set enrichment analysis of top differentially expressed gene (1406 total) in the Ccl9<sup>high</sup> cluster. NES = normalized enrichment score.
- (E) Heatmap of Top 20 differentially expressed genes (DEG) between each of the indicated iBC-derived lineages and their endogenous counterparts.
- (F) Violin plots comparing club cell proximal-distal patterning markers<sup>45</sup> between endogenous and donor-derived secretory cells. Statistical analysis done with Wilcoxon signed-rank test, with adjusted p values shown only for significantly different expression levels.
- (G) Immunofluorescence confocal microscopy for GFP and SCGB1A1 or SCGB3A2 in iBC recipient tracheas. Nuclei are counterstained with Hoechst33342. Green arrows indicate GFP+ cells co-expressing SCGB1A1 or SCGB3A2. Blue arrows indicate GFP- (endogenous) cells expressing SCGB1A1 or SCGB3A2. Scale bar, 10  $\mu$ m.
- (H) Quantification of SCGB1A1+ or SCGB3A2+ cells among donor-derived (GFP+) or endogenous cells. Bars indicate mean +/- SD. Statistical analysis performed by unpaired, two-tailed Student's t-test (n = 3 animals, 1165 donor-derived cells, 934 endogenous cells).

**A****7° murine iBC transplantation kinetics**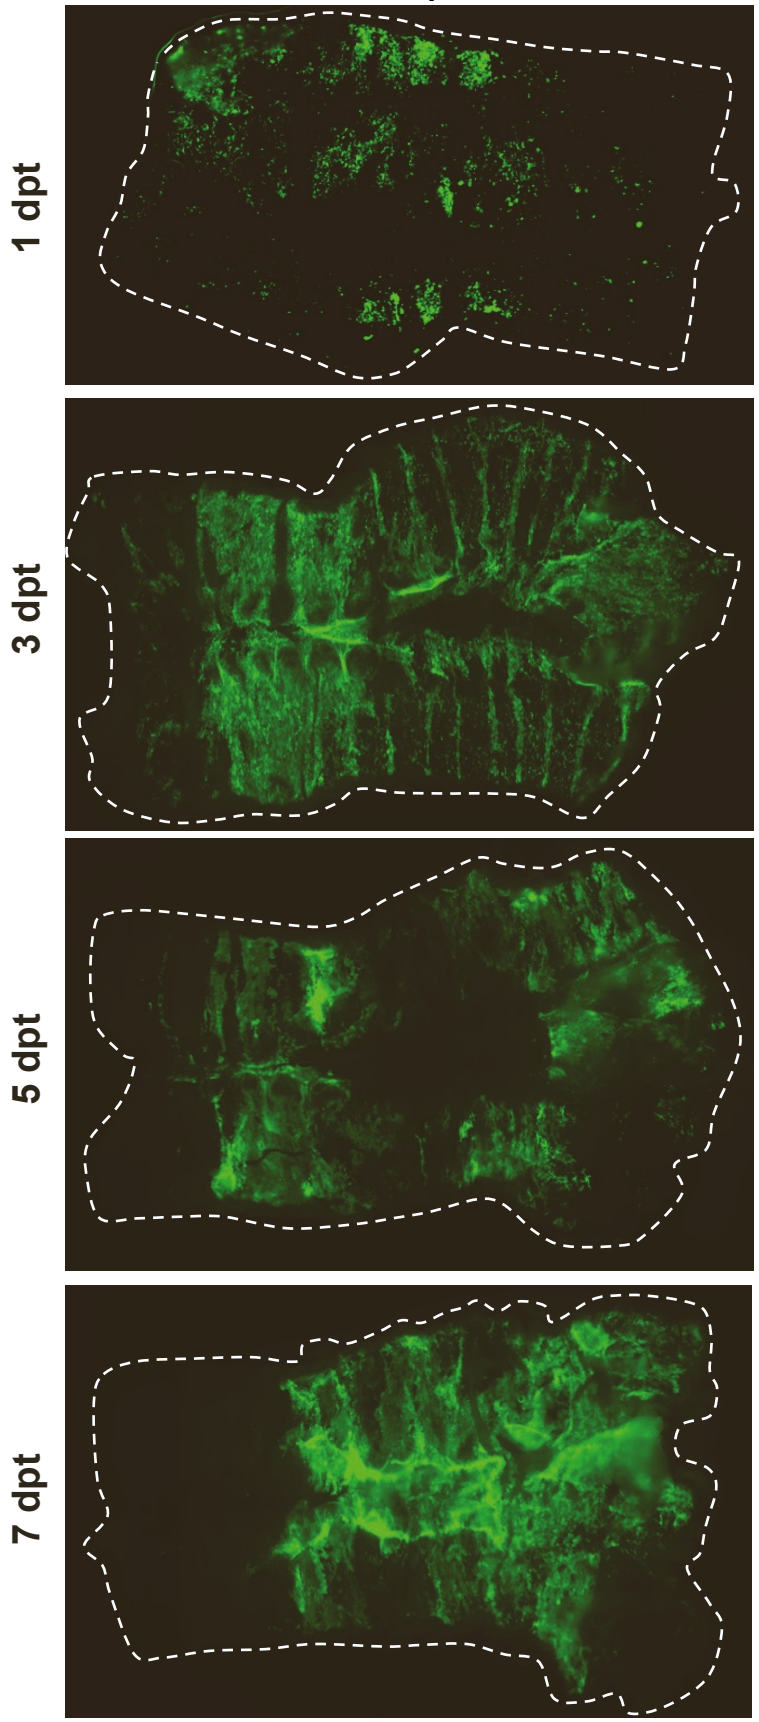**B****GFP KRT5 SCGB1A1 Nuclei**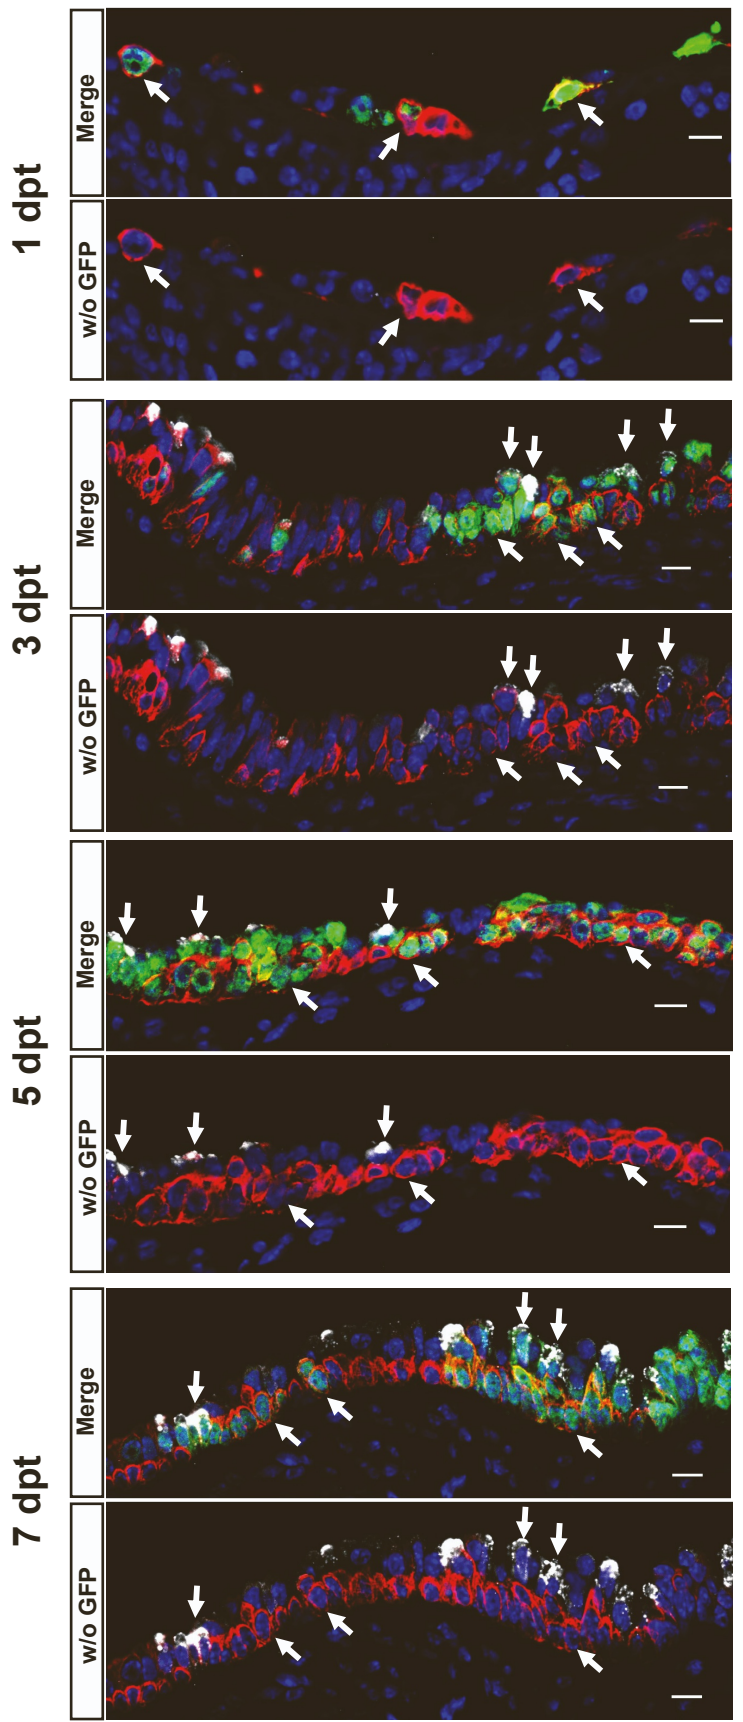

**Supplementary Figure 6: Dynamic changes post-murine iBC serial transplantation into 7<sup>th</sup> generation (7°) recipients, Related to Main Figure 5**

- (A) Whole mount fluorescence of iBC recipients 1, 3, 5 or 7 days post-transplantation.
- (B) Immunofluorescence confocal microscopy for GFP, SCGB1A1, and KRT5 in 7° iBC recipient tracheas at 1, 3, 5, or 7 days post-transplantation. Nuclei are counterstained with Hoechst33342. White arrows indicate GFP+ cells co-expressing canonical airway epithelial markers. Lower panels have the GFP channel removed. Scale bars, 10  $\mu$ m.

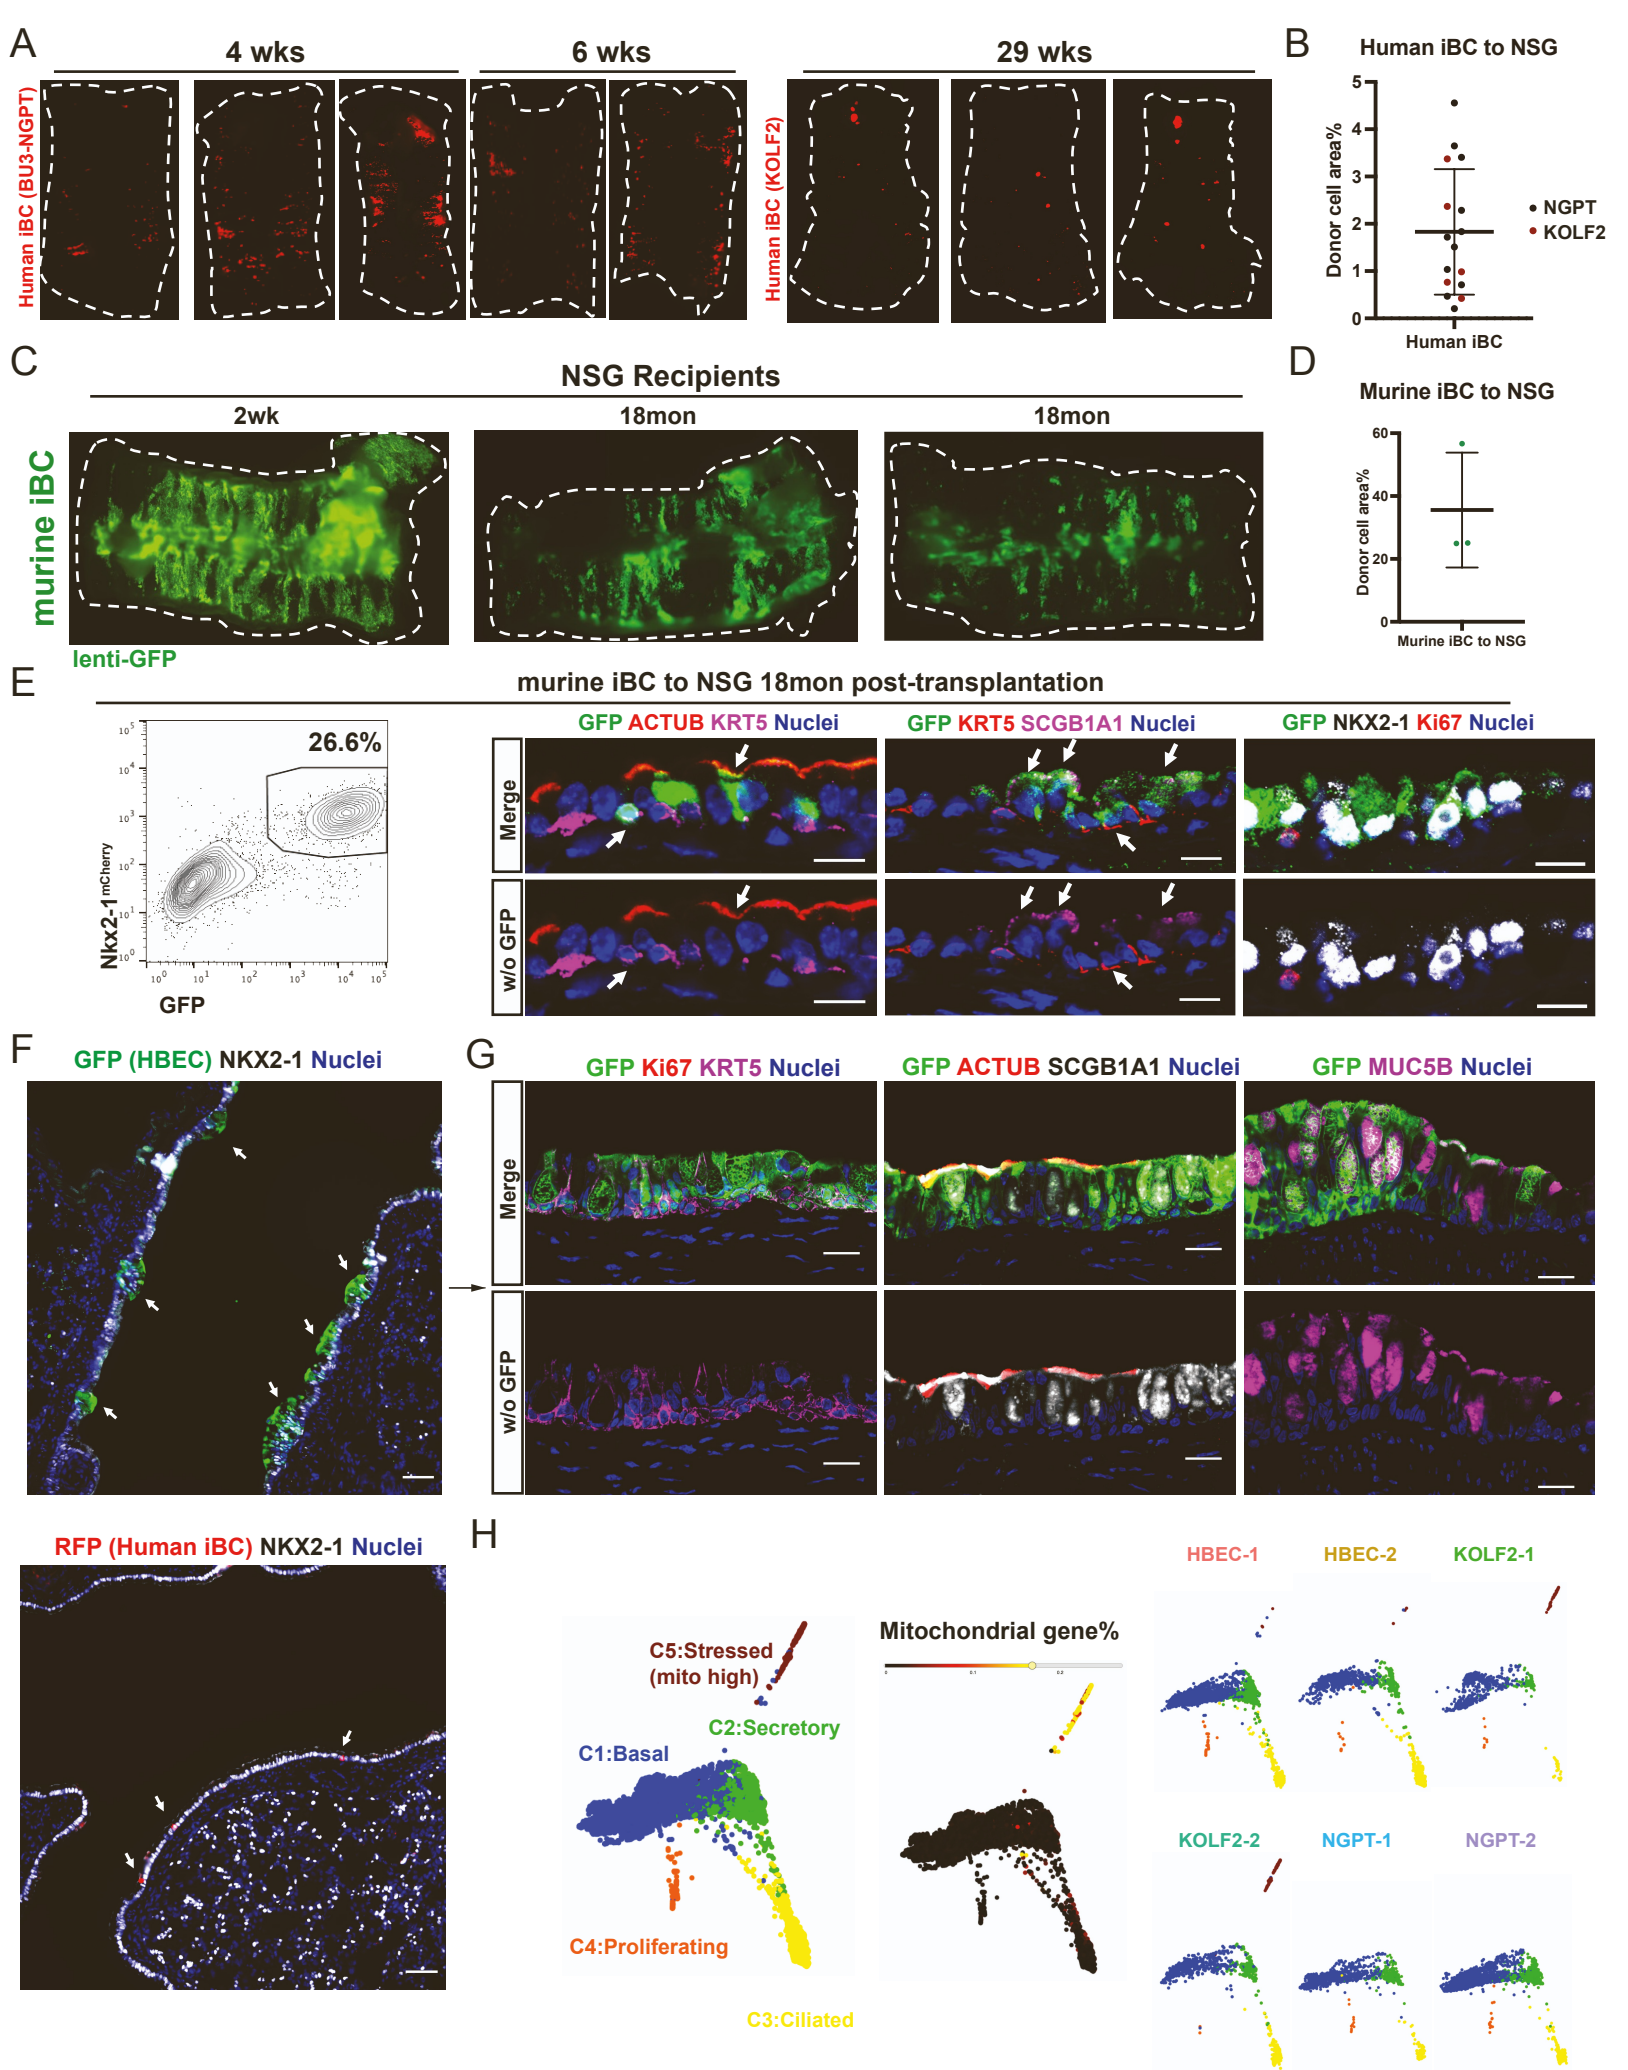

**Supplementary Figure 7: Characterization of human or mouse cells post-transplantation into injured NSG recipients, Related to Main Figure 7**

- (A) Whole mount fluorescence of iBC (BU3-NGPT and KOLF2) recipient tracheas (BU3 NGPT n =11; KOLF2 n = 5) at various harvest timepoints (4, 6 , or 29 weeks).
- (B) Quantification of human iBC (BU3-NGPT indicated by black dots and KOLF2 indicated by red dots) transplantation efficiency, shown as RFP+% area over total recipient trachea area. Bars indicate mean +/- SD.
- (C) Whole mount fluorescence of NSG recipient tracheas that received murine iBC transplantation at various harvest timepoints (2 weeks or 18 months).
- (D) Quantification of murine iBC into NSG recipient transplantation efficiency, shown as GFP+% area over total recipient trachea area. Bars indicate mean +/- SD.
- (E) FACS and Immunofluorescence confocal microscopy for GFP, ACTUB, SCGB1A1, Ki67, and KRT5 in NSG recipient that received murine iBC 18 months post-transplantation. Nuclei are counterstained with Hoechst33342. White arrows indicate GFP+ cells co-expressing canonical airway epithelial markers. Lower panels have GFP channel removed. Scale bar, 10  $\mu$ m.
- (F) Immunofluorescence confocal microscopy for RFP (iBC) or GFP (HBEC) and NKX2-1 in the intrapulmonary airway of NSG recipients. White arrows indicate RFP+ or GFP+ donor-derived cells. Scale bar, 50  $\mu$ m.
- (G) Immunofluorescence confocal microscopy for GFP, KI67, KRT5, SCGB1A1, ACTUB, and MUC5B in the intrapulmonary airway of NSG recipient. Nuclei are counterstained with Hoechst33342. Lower panels have GFP channel removed. Scale bar, 10  $\mu$ m.
- (H) SPRING visualization of scRNA-Seq of human cell transplantation recipients, colored by Louvain clustering (resolution = 0.1) or sample of origin as in Figure 7. Mitochondrial gene percentage of human cells profiled by scRNA-seq six weeks after transplantation into mouse recipient tracheas is also shown.
